# Supplementary material for: Luis Garralda, presidente del Comité Organizador de Expodental: "la próxima feria de Expodental ocupará más superficie que nunca"
Source: MDPI journal article supplement (doi:10.3390/ijms24065266), 2011-01-01
Supplement: s1 [file s1]

## Supplementary Material

### Supplementary Figure

A

Ank<sup>GAG</sup>1D4<sub>NC-NC</sub>

```

|6XHis-tag·||·····N-cap·····|
MRGSHHHHHHGSAAADLGKKLLEAARAGQDDEVRLLEHGADVNR
|·····1st repeat·····|
DSIGSTPLHLAAYYGHLEIVRLLEHGADVNR
|·····2nd repeat·····|
DSTGTTPLHYAARLGHLEIVRLLEHGADVNR
|·····3rd repeat·····|
DAMGWTPLHLAAKKGHLEIVRLLKKGADVNR
|·····C-cap·····||·····Flexible Linker·····|
DHFGKTAFDISIDNGNEDLAEILLQGGGGSGGGSGGGSGGGGSTS
|·····N-cap·····|
DLGKKLLEAARAGQDDEVRLLEHGADVNR
|·····1st repeat·····|
DSIGSTPLHLAAYYGHLEIVRLLEHGADVNR
|·····2nd repeat·····|
DSTGTTPLHYAARLGHLEIVRLLEHGADVNR
|·····3rd repeat·····|
DAMGWTPLHLAAKKGHLEIVRLLKKGADVNR
|·····C-cap·····|
DHFGKTAFDISIDNGNEDLAEILQSLIS

```

B

Ank<sup>GAG</sup>1D4<sub>NC-CN</sub>

```

|6XHis-tag·||·····N-cap·····|
MRGSHHHHHHGSAAADLGKKLLEAARAGQDDEVRLLEHGADVNR
|·····1st repeat·····|
DSIGSTPLHLAAYYGHLEIVRLLEHGADVNR
|·····2nd repeat·····|
DSTGTTPLHYAARLGHLEIVRLLEHGADVNR
|·····3rd repeat·····|
DAMGWTPLHLAAKKGHLEIVRLLKKGADVNR
|·····C-cap·····||·····Flexible Linker·····|
DHFGKTAFDISIDNGNEDLAEILLQGGGGSGGGSGGGSGGGGSTS
|·····C-cap·····|
LIEALDENGNDISIDFATKGFHD
|·····1st repeat·····|
NANVDAGHKLLLRVIELHGKKAALHLPWTGMAD
|·····2nd repeat·····|
RANVDAGHELLLRVIELHGLRAAYHLPPTGTSD
|·····3rd repeat·····|
RANVDAGHELLLRVIELHGYAALHLPSTGISD
|·····N-cap·····|
RANVDAGHELLLRVEDDQGARAELLKKGLD

```

**Figure S1.** Amino acid sequences of dimeric Ank<sup>GAG</sup>1D4. The design of dimer platforms featured the different orientations of monomeric Ank<sup>GAG</sup>1D4, consisting of three repetitive domains (blue) connected by a flexible linker (green) and flanked by N- and C-terminal capping repeats (red). (A) Ank<sup>GAG</sup>1D4<sub>NC-NC</sub>, the C-terminus of the Ank<sup>GAG</sup>1D4 module is connected to the N-terminus of the

second module. (B) Ank<sup>GAG</sup>1D4<sub>NC-CN</sub>, the C-terminus of the Ank<sup>GAG</sup>1D4 module is connected to the C-terminus of the second module.
